# Supplementary material for: Epidemiology and Genetic Analysis of SARS-CoV-2 in Myanmar during the Community Outbreaks in 2020
Source: MDPI journal article supplement (doi:10.3390/v14020259), 2022-01-27
Supplement: s1 [file s1]

**Table S2.** Demographic and genetic characteristics of GISAID registered COVID-19 sequences from Myanmar from the other study in 2020 [13] [14].

| No | Strain name                      | Age (years) | Sex | Place  | Contact history | Travel history (foreign) | Date of RT-PCR test (2020) | Symptoms                | Outcome   | Next strain clade | GISAID clade | PANGOLIN lineage |
|----|----------------------------------|-------------|-----|--------|-----------------|--------------------------|----------------------------|-------------------------|-----------|-------------------|--------------|------------------|
| 1  | hCoV-19/ MMC137/ 2020            | 7           | F   | Yangon | Yes             | No                       | 22-Apr                     | No                      | Recovered | 19A               | O            | B.6              |
| 2  | hCoV-19/ Myanmar/ DMR-MM01 /2020 | 35          | F   | Yangon | Yes             | No                       | 24-Apr                     | No                      | Recovered | 19A               | O            | B.6              |
| 3  | hCoV-19/Myanmar/DMR-MM02/2020    | 31          | F   | Yangon | Yes             | No                       | 24-Apr                     | No                      | Recovered | 19A               | O            | B.6              |
| 4  | hCoV-19/ Myanmar/ DMR-MM03 /2020 | 53          | M   | Yangon | Yes             | No                       | 24-Apr                     | No                      | Recovered | 19A               | O            | B.6              |
| 5  | hCoV-19/ Myanmar/ DMR-MM04 /2020 | 48          | M   | Yangon | No              | No                       | 3-May                      | Unknown                 | Recovered | 19A               | O            | B.6              |
| 6  | hCoV-19/ Myanmar/ DMR-MM05 /2020 | 28          | F   | Yangon | Yes             | No                       | 7-May                      | Sneezing, loss of taste | Recovered | 20B               | GR           | B.1.1            |
| 7  | hCoV-19/ Myanmar/ DMR-MM06 /2020 | 41          | F   | Yangon | No              | Yes (India)              | 25-May                     | Unknown                 | Recovered | 20A               | GH           | B.1.36           |
| 8  | hCoV-19/ Myanmar/DMR-MM07 /2020  | 29          | F   | Yangon | No              | Yes (China)              | 2-Jun                      | Unknown                 | Recovered | 20A               | G            | B.1.210          |
| 9  | hCoV-19/ Myanmar/ DMR-MM08 /2020 | 63          | F   | Yangon | No              | Yes (India)              | 26-May                     | Unknow                  | Recovered | 20A               | GH           | B.1.36           |
| 10 | hCoV-19/ Myanmar/ DMR-MM09 /2020 | 66          | M   | Yangon | No              | Yes (India)              | 26-May                     | Unknown                 | Recovered | 20A               | GH           | B.1.36           |
| 11 | hCoV-19/ Myanmar/ DMR-MM10 /2020 | 40          | F   | Yangon | No              | Yes (India)              | 30-May                     | Unknown                 | Recovered | 20B               | GR           | B.1.1.174        |
| 12 | hCoV-19/ Myanmar/ DMR-MM11 /2020 | 22          | M   | Sittwe | Yes             | No                       | 21-Aug                     | Unknown                 | Recovered | 20A               | GH           | B.1.36.16        |
| 13 | hCoV-19/ Myanmar/ DMR-MM12 /2020 | 58          | M   | Sittwe | Yes             | No                       | 21-Aug                     | Unknown                 | Recovered | 20A               | GH           | B.1.36.16        |
| 14 | hCoV-19/ Myanmar/ DMR-MM13 /2020 | 28          | M   | Sittwe | Yes             | No                       | 21-Aug                     | Unknown                 | Recovered | 20A               | GH           | B.1.36.16        |
| 15 | hCoV-19/ Myanmar/ DMR-MM14 /2020 | 38          | F   | Sittwe | No              | No                       | 20-Aug                     | Unknown                 | Recovered | 20A               | GH           | B.1.36.16        |
| 16 | hCoV-19/ Myanmar/ DMR-MM15 /2020 | 29          | F   | Sittwe | No              | No                       | 20-Aug                     | Unknown                 | Recovered | 20A               | GH           | B.1.36.16        |

|    |                                     |    |   |        |     |                      |        |         |           |     |    |           |
|----|-------------------------------------|----|---|--------|-----|----------------------|--------|---------|-----------|-----|----|-----------|
| 17 | hCoV-19/ Myanmar/<br>DMR-MM16 /2020 | 83 | M | Sittwe | No  | No                   | 20-Aug | Unknown | Recovered | 20A | GH | B.1.36.16 |
| 18 | hCoV-19/ Myanmar/<br>DMR-MM17 /2020 | 28 | F | Sittwe | Yes | No                   | 20-Aug | Unknown | Recovered | 20A | GH | B.1.36.16 |
| 19 | hCoV-19/ Myanmar/<br>DMR-MM18 /2020 | 43 | M | Sittwe | Yes | No                   | 21-Aug | Unknown | Recovered | 20A | GH | B.1.36.16 |
| 20 | hCoV-19/ Myanmar/<br>DMR-MM19 /2020 | 50 | F | Sittwe | Yes | No                   | 19-Aug | Unknown | Recovered | 20A | GH | B.1.36.16 |
| 21 | hCoV-19/ Myanmar/<br>DMR-MM20 /2020 | 21 | F | Sittwe | No  | Yes<br>(Philippines) | 19-Aug | Unknown | Recovered | 20B | GR | B.1.1.263 |
| 22 | hCoV-19/ Myanmar/<br>DMR-MM21 /2020 | 75 | M | Yangon | No  | No                   | 12-Sep | Unknown | Deceased  | 20A | GH | B.1.36.16 |
| 23 | hCoV-19/ Myanmar/<br>DMR-MM22 /2020 | 84 | F | Yangon | No  | No                   | 13-Sep | Unknown | Deceased  | 20A | GH | B.1.36.16 |
| 24 | hCoV-19/ Myanmar/<br>DMR-MM23 /2020 | 58 | M | Yangon | Yes | No                   | 16-Sep | Unknown | Deceased  | 20A | GH | B.1.36.16 |
| 25 | hCoV-19/ Myanmar/<br>DMR-MM24 /2020 | 67 | M | Yangon | Yes | No                   | 16-Sep | Unknown | Deceased  | 20A | GH | B.1.36.16 |
| 26 | hCoV-19/ Myanmar/<br>DMR-MM25 /2020 | 24 | M | Yangon | No  | No                   | 14-Sep | Unknown | Deceased  | 20A | GH | B.1.36.16 |
| 27 | hCoV-19/ Myanmar/<br>DMR-MM26 /2020 | 74 | M | Yangon | No  | No                   | 17-Sep | Unknown | Deceased  | 20A | GH | B.1.36.16 |
| 28 | hCoV-19/ Myanmar/<br>DMR-MM27 /2020 | 75 | F | Yangon | Yes | No                   | 17-Sep | Unknown | Deceased  | 20A | GH | B.1.36.16 |
| 29 | hCoV-19/ Myanmar/<br>DMR-MM28 /2020 | 48 | F | Yangon | No  | No                   | 17-Sep | Unknown | Deceased  | 20A | GH | B.1.36.16 |
| 30 | hCoV-19/ Myanmar/<br>DMR-MM29 /2020 | 23 | F | Yangon | No  | No                   | 17-Sep | Unknown | Deceased  | 20A | GH | B.1.36.16 |
| 31 | hCoV-19/ Myanmar/<br>DMR-MM30 /2020 | 53 | M | Yangon | No  | No                   | 28-Sep | Unknown | Recovered | 20A | GH | B.1.36.16 |

## References

- Ministry of health and sports Myanmar COVID-19 Surveillance Dashboard. Available online: <https://moths.gov.mm/> (accessed on 14 January 2022).
- Nyunt, M. H.; Soe, H. O.; Aye, K. T.; Aung, W. W.; Kyaw, Y. Y.; Kyaw, A. K.; Myat, T. W.; Latt, A. Z.; Win, M. M.; Win, A. A.; et al., Surge of severe acute respiratory syndrome coronavirus 2 infections linked to single introduction of a virus strain in Myanmar, 2020. *Sci. Rep.* **2021**, 11, (1), 10203.
