# Supplementary material for: Epidemiology and Genetic Analysis of SARS-CoV-2 in Myanmar during the Community Outbreaks in 2020
Source: MDPI journal article supplement (doi:10.3390/v14020259), 2022-01-27

**(A)** Number of COVID-19 confirmed cases in Rakhine State

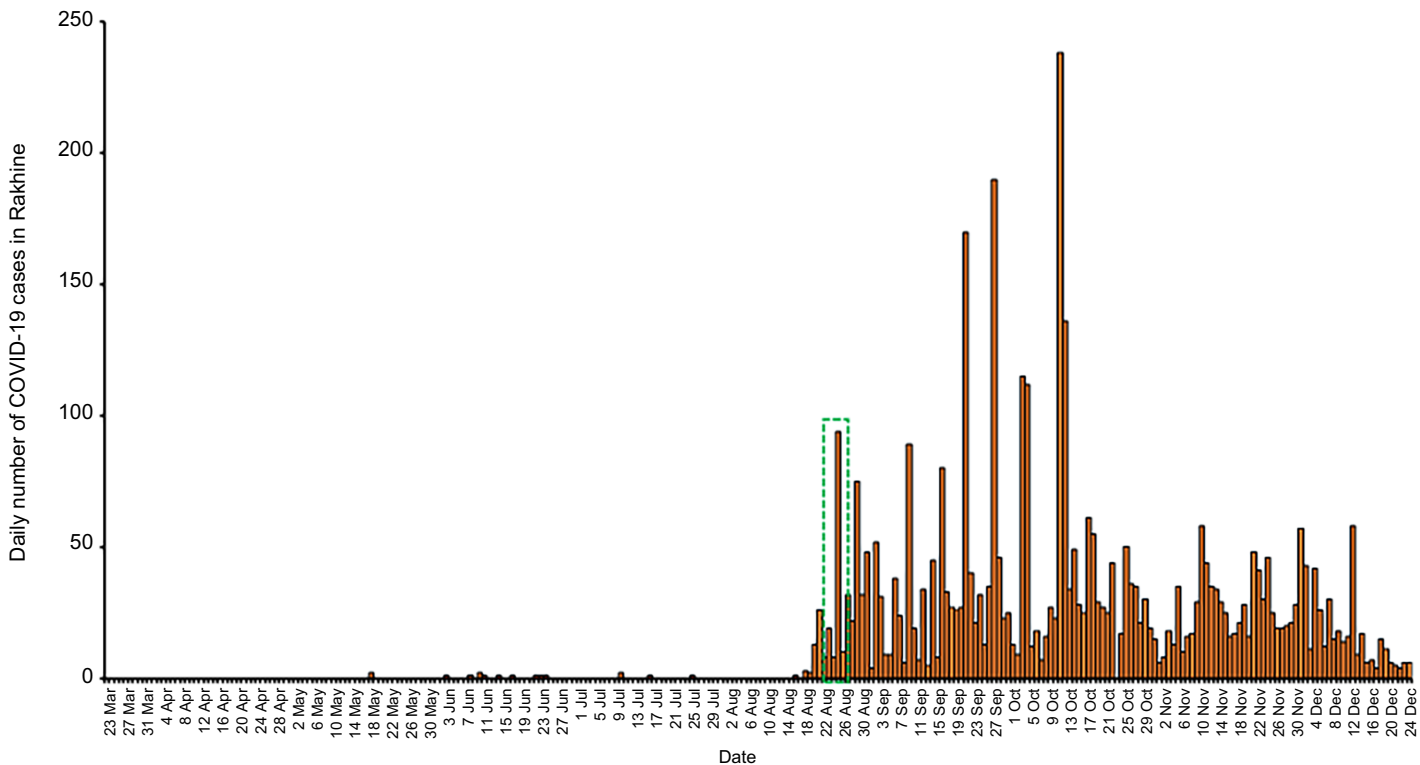

**(B)** Number of COVID-19 death cases in Rakhine State

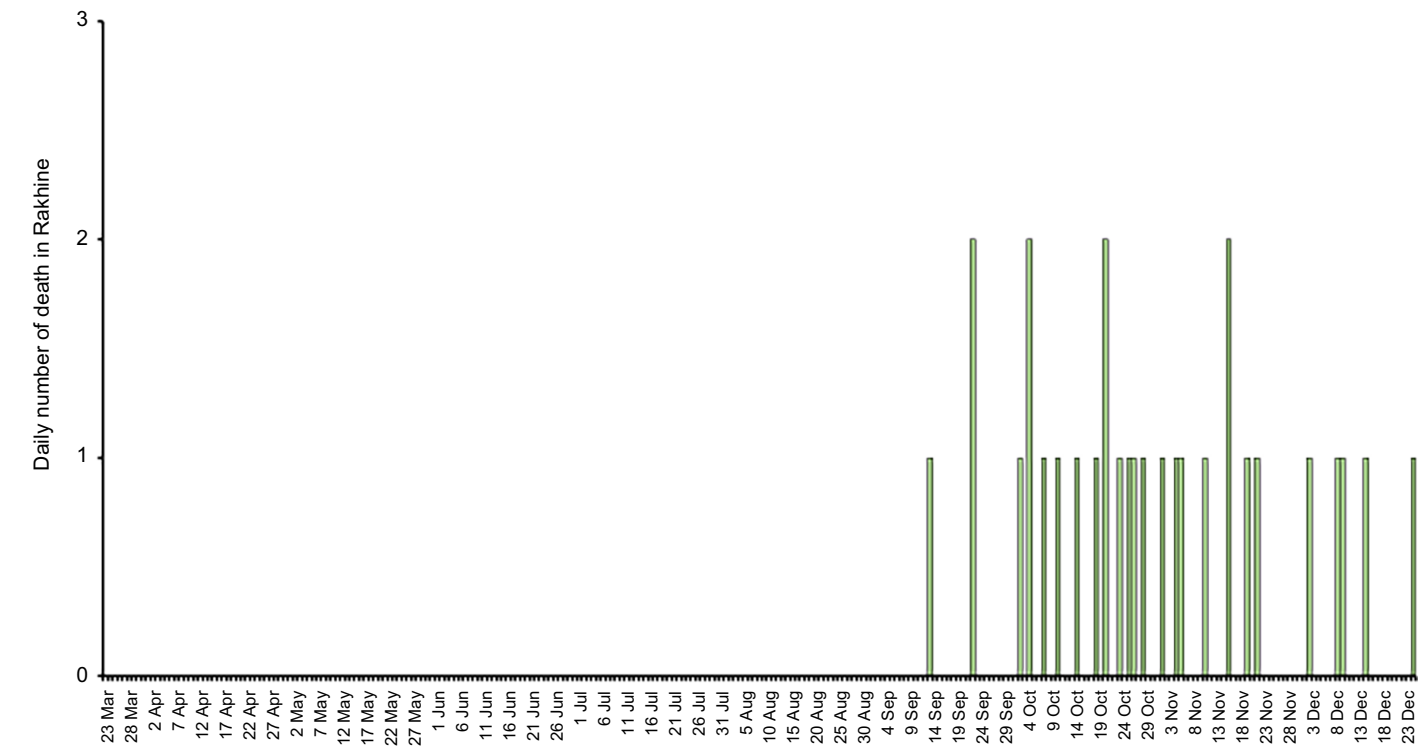

Supplement: s1 [file s1]
